# Supplementary material for: Association of HLA-class II alleles with risk of relapse in myeloperoxidase-antineutrophil cytoplasmic antibody positive vasculitis in the Japanese population
Source: bioRxiv or medRxiv preprint supplement (doi:10.1101/2022.12.28.22283983), 2023-02-16
Supplement: Supplementary file [file media-1.pdf]

Supplementary Table S1. Association analysis of each *HLA-DRB1* allele with occurrence of relapse and time to relapse

|                                | Carrier frequency |                    | Relapse-free survival |                  |                                |
|--------------------------------|-------------------|--------------------|-----------------------|------------------|--------------------------------|
|                                | Relapse (+: n=39) | Relapse (-: n=160) | $P_{\text{uncorr}}^1$ | OR (95%CI)       | log-rank $P_{\text{uncorr}}^2$ |
|                                | n (%)             | n (%)              |                       |                  |                                |
| <i>DRB1*01:01</i>              | 5 (12.8)          | 28 (17.5)          | 0.63                  | 0.69 (0.25-1.93) | 0.53                           |
| <i>DRB1*04:01</i>              | 1 (2.6)           | 1 (0.6)            | 0.35                  | 4.18 (0.26-68.4) | 0.37                           |
| <i>DRB1*04:05</i>              | 7 (17.9)          | 35 (21.9)          | 0.67                  | 0.78 (0.32-1.92) | 0.58                           |
| <i>DRB1*04:06</i>              | 4 (10.3)          | 8 (5.0)            | 0.26                  | 2.17 (0.62-7.62) | 0.25                           |
| <i>DRB1*04:10</i>              | 1 (2.6)           | 3 (1.9)            | 0.59                  | 1.38 (0.14-13.6) | 0.65                           |
| <i>DRB1*08:02</i> <sup>3</sup> | 7 (17.9)          | 11 (6.9)           | 0.055                 | 2.96 (1.07-8.23) | 0.040                          |
| <i>DRB1*08:03</i>              | 4 (10.3)          | 15 (9.4)           | 0.77                  | 1.10 (0.35-3.53) | 0.83                           |
| <i>DRB1*09:01</i> <sup>3</sup> | 22 (56.4)         | 62 (38.8)          | 0.049                 | 2.05 (1.01-4.15) | 0.049                          |
| <i>DRB1*11:01</i>              | 1 (2.6)           | 8 (5.0)            | 1.00                  | 0.50 (0.06-4.12) | 0.47                           |
| <i>DRB1*12:01</i>              | 3 (7.7)           | 11 (6.9)           | 0.74                  | 1.13 (0.30-4.26) | 0.87                           |
| <i>DRB1*12:02</i>              | 1 (2.6)           | 3 (1.9)            | 0.59                  | 1.38 (0.14-13.6) | 0.58                           |
| <i>DRB1*13:02</i>              | 1 (2.6)           | 14 (8.8)           | 0.31                  | 0.27 (0.03-2.15) | 0.22                           |
| <i>DRB1*14:05</i>              | 1 (2.6)           | 5 (3.1)            | 1.00                  | 0.82 (0.09-7.19) | 0.79                           |
| <i>DRB1*14*54</i>              | 3 (7.7)           | 15 (9.4)           | 1.00                  | 0.81 (0.22-2.93) | 0.79                           |
| <i>DRB1*15:01</i>              | 5 (12.8)          | 16 (10.0)          | 0.57                  | 1.32 (0.45-3.86) | 0.60                           |
| <i>DRB1*15:02</i>              | 9 (23.1)          | 34 (21.3)          | 0.83                  | 1.11 (0.48-2.56) | 0.80                           |
| <i>DRB1*16:02</i>              | 1 (2.6)           | 3 (1.9)            | 0.59                  | 1.38 (0.14-13.6) | 0.74                           |

OR: odds ratio, CI: confidence interval.

\*<sup>1</sup>Carrier frequency (%) of each *HLA-DRB1* allele was compared between the patients with and without relapse by Fisher's exact test. Uncorrected P values ( $P_{\text{uncorr}}$ ) are shown.

\*<sup>2</sup>Time to relapse after achievement of remission was compared between the patients carrying and not-carrying each *HLA-DRB1* allele. Log-rank  $P_{\text{uncorr}}$  values for the relapse-free survival rate calculated by Kaplan-Meier method are shown.

\*<sup>3</sup>For *DRB1\*08:02* and *DRB1\*09:01*, FDR Q values are shown in the main document (Table 4).

Supplementary Table S2. Association analysis of each *HLA-DQA1* allele with occurrence of relapse and time to relapse

|                                 | Carrier frequency |                    | Relapse-free survival             |                  |                                            |
|---------------------------------|-------------------|--------------------|-----------------------------------|------------------|--------------------------------------------|
|                                 | Relapse (+: n=39) | Relapse (-: n=159) | P <sub>uncorr</sub> <sup>*1</sup> | OR (95%CI)       | log-rank P <sub>uncorr</sub> <sup>*2</sup> |
|                                 | n (%)             | n (%)              |                                   |                  |                                            |
| <i>DQA1*01:01</i>               | 5 (12.8)          | 28 (17.6)          | 0.63                              | 0.69 (0.25-1.91) | 0.52                                       |
| <i>DQA1*01:02</i>               | 7 (17.9)          | 30 (18.9)          | 1.0                               | 0.94 (0.38-2.33) | 0.96                                       |
| <i>DQA1*01:03</i>               | 13 (33.3)         | 47 (29.6)          | 0.70                              | 1.19 (0.56-2.52) | 0.65                                       |
| <i>DQA1*01:04</i>               | 3 (7.7)           | 21 (13.2)          | 0.42                              | 0.55 (0.15-1.94) | 0.38                                       |
| <i>DQA1*03:01</i>               | 7 (17.9)          | 27 (17)            | 1.0                               | 1.07 (0.43-2.67) | 0.94                                       |
| <i>DQA1*03:02</i> <sup>*3</sup> | 24 (61.5)         | 64 (40.3)          | 0.020                             | 2.38 (1.16-4.87) | 0.020                                      |
| <i>DQA1*03:03</i>               | 9 (23.1)          | 37 (23.3)          | 1.0                               | 0.99 (0.43-2.27) | 0.97                                       |
| <i>DQA1*04:01</i>               | 4 (10.3)          | 5 (3.1)            | 0.077                             | 3.52 (0.90-13.8) | 0.075                                      |
| <i>DQA1*05:05</i>               | 1 (2.6)           | 14 (8.8)           | 0.31                              | 0.27 (0.03-2.14) | 0.18                                       |
| <i>DQA1*05:08</i>               | 2 (5.1)           | 3 (1.9)            | 0.26                              | 2.81 (0.45-17.4) | 0.18                                       |
| <i>DQA1*06:01</i>               | 1 (2.6)           | 4 (2.5)            | 1.0                               | 1.02 (0.11-9.39) | 0.70                                       |

OR: odds ratio, CI: confidence interval.

<sup>\*1</sup>Carrier frequency (%) of each *HLA-DQA1* allele was compared between the patients with and without relapse by Fisher's exact test.

Uncorrected P values (P<sub>uncorr</sub>) are shown.

<sup>\*2</sup>Time to relapse after achievement of remission was compared between the patients carrying and not-carrying each *HLA-DQA1* allele. Log-rank P<sub>uncorr</sub> values for the relapse-free survival rate calculated by Kaplan-Meier method are shown.

\*<sup>3</sup> For *DQA1\*03:02*, FDR Q value is shown in the main document (Table 4).

Supplementary Table S3. Association analysis of each *HLA-DQB1* allele with occurrence of relapse and time to relapse

|                                 | Carrier frequency |                    | Relapse-free survival    |                  |                                   |
|---------------------------------|-------------------|--------------------|--------------------------|------------------|-----------------------------------|
|                                 | Relapse (+: n=39) | Relapse (-: n=160) | $P_{\text{uncorr}}^{*1}$ | OR (95%CI)       | log-rank $P_{\text{uncorr}}^{*2}$ |
|                                 | n (%)             | n (%)              |                          |                  |                                   |
| <i>DQB1*03:01</i>               | 5 (12.8)          | 36 (22.5)          | 0.27                     | 0.51 (0.18-1.39) | 0.21                              |
| <i>DQB1*03:02</i>               | 7 (17.9)          | 27 (16.9)          | 0.82                     | 1.08 (0.43-2.69) | 0.93                              |
| <i>DQB1*03:03</i> <sup>*3</sup> | 23 (59.0)         | 65 (40.6)          | 0.048                    | 2.10 (1.03-4.28) | 0.043                             |
| <i>DQB1*04:01</i>               | 7 (17.9)          | 34 (21.3)          | 0.83                     | 0.81 (0.33-2.00) | 0.63                              |
| <i>DQB1*04:02</i>               | 5 (12.8)          | 10 (6.3)           | 0.18                     | 2.21 (0.71-6.87) | 0.18                              |
| <i>DQB1*05:01</i>               | 5 (12.8)          | 28 (17.5)          | 0.63                     | 0.69 (0.25-1.93) | 0.53                              |
| <i>DQB1*05:02</i>               | 2 (5.1)           | 12 (7.5)           | 1.0                      | 0.67 (0.14-3.11) | 0.65                              |
| <i>DQB1*05:03</i>               | 2 (5.1)           | 12 (7.5)           | 1.0                      | 0.67 (0.14-3.11) | 0.63                              |
| <i>DQB1*06:01</i>               | 13 (33.3)         | 47 (29.4)          | 0.70                     | 1.20 (0.57-2.54) | 0.63                              |
| <i>DQB1*06:02</i>               | 5 (12.8)          | 15 (9.4)           | 0.55                     | 1.42 (0.48-4.18) | 0.50                              |
| <i>DQB1*06:04</i>               | 1 (2.6)           | 13 (8.1)           | 0.31                     | 0.30 (0.04-2.35) | 0.26                              |

OR: odds ratio, CI: confidence interval.

<sup>\*1</sup>Carrier frequency (%) of each *HLA-DQB1* allele was compared between the patients with and without relapse by Fisher's exact test.

Uncorrected P values ( $P_{\text{uncorr}}$ ) are shown.

<sup>\*2</sup>Time to relapse after achievement of remission was compared between the patients carrying and not-carrying each *HLA-DQB1* allele. Log-rank  $P_{\text{uncorr}}$  values for the relapse-free survival rate calculated by Kaplan-Meier method are shown.

\*<sup>3</sup>For *DQB1\*03:03*, FDR Q value is shown in the main document (Table 4).

Supplementary Table S4. Association analysis of each *HLA-DPB1* allele with occurrence of relapse and time to relapse

|                   | Carrier frequency |                    | Relapse-free survival             |                  |                                            |
|-------------------|-------------------|--------------------|-----------------------------------|------------------|--------------------------------------------|
|                   | Relapse (+: n=39) | Relapse (-: n=160) | P <sub>uncorr</sub> <sup>*1</sup> | OR (95%CI)       | log-rank P <sub>uncorr</sub> <sup>*2</sup> |
|                   | n (%)             | n (%)              |                                   |                  |                                            |
| <i>DPB1*02:01</i> | 22 (56.4)         | 72 (45.0)          | 0.22                              | 1.58 (0.78-3.20) | 0.27                                       |
| <i>DPB1*02:02</i> | 2 (5.1)           | 13 (8.1)           | 0.74                              | 0.61 (0.13-2.83) | 0.58                                       |
| <i>DPB1*03:01</i> | 5 (12.8)          | 14 (8.8)           | 0.54                              | 1.53 (0.52-4.55) | 0.38                                       |
| <i>DPB1*04:01</i> | 1 (2.6)           | 10 (6.3)           | 0.70                              | 0.39 (0.05-3.18) | 0.41                                       |
| <i>DPB1*04:02</i> | 8 (20.5)          | 42 (26.3)          | 0.54                              | 0.73 (0.31-1.70) | 0.54                                       |
| <i>DPB1*05:01</i> | 22 (56.4)         | 87(54.4)           | 0.86                              | 1.09 (0.54-2.20) | 0.81                                       |
| <i>DPB1*09:01</i> | 8 (20.5)          | 31 (19.4)          | 0.83                              | 1.07 (0.45-2.56) | 0.89                                       |
| <i>DPB1*13:01</i> | 2 (5.1)           | 4 (2.5)            | 0.33                              | 2.11 (0.37-11.9) | 0.45                                       |

OR: odds ratio, CI: confidence interval.

\*<sup>1</sup>Carrier frequency (%) of each *HLA-DPB1* allele was compared between the patients with and without relapse by Fisher's exact test.

Uncorrected P values (P<sub>uncorr</sub>) are shown.

\*<sup>2</sup>Time to relapse after achievement of remission was compared between the patients carrying and not-carrying each *HLA-DPB1* allele. Log-rank P<sub>uncorr</sub> values for the relapse-free survival rate calculated by Kaplan-Meier method are shown.
